# Supplementary material
Source: publisher figshare collection journal article supplement (https://sage.figshare.com/ndownloader/files/23235296)
Supplement: Supplementary file 1 [file 23235296]

# **Notes from the Field: Availability of Satellite Pharmacies and Pharmacy Service Units in Nigerian Hospitals - Implication for Pharmaceutical Care**

## **Appendix A**

### **Operational definition adapted from the PCN's four-part compendium (PCN, 2012)**

*Hospital pharmacists:* A member of the professional healthcare team in hospital charged with the responsibility of sourcing, stocking, preserving, compounding and taking responsibility for drug therapy, filling of a prescription, advising on the selection, safe and effective use of medicines and medical devices. The hospital pharmacist is also involved in ensuring the quality assurance of medicines and therapeutic drug monitoring and participate in clinical meetings in hospitals (PCN, 2012).

*Drug revolving fund (DRF):* This is a funding scheme for the provision of essential drugs and medical consumables to a health facility on a continuous and uninterrupted basis, and at an affordable cost to patients. The proceeds from sales are ploughed back into the system (revolve) to ensure a re-purchase of the same or other relevant drugs in the system (PCN, 2012).

*Drug procurement unit:* The unit responsible for the purchase of drugs and other consumables for the hospital (PCN, 2012).

*Pharmacovigilance Unit:* The unit responsible for receiving from healthcare professionals and patients any noxious and unintended responses to medicines at doses typically used for prevention, diagnosis and treatment of diseases or the modification of physiological functions and reporting same to the National Agency for Food and Drug Administration and Control (NAFDAC), among other responsibilities (PCN, 2012).

*Drug information unit:* This is the unit responsible for the collection, collating and disseminating of accurate information on medications, diseases and developments in professional pharmaceutical practice. The information at the centre may be patient-specific or population-based and an integral part of pharmaceutical care to provide support for decisions

## **Notes from the Field: Availability of Satellite Pharmacies and Pharmacy Service Units in Nigerian Hospitals - Implication for Pharmaceutical Care**

made by physicians, nurses or other members of the healthcare team and the public about any drug-related problem (PCN, 2012).

*Research laboratory:* A small laboratory at tertiary health facilities responsible for carrying out laboratory research for drug evaluation (PCN, 2012).

*Hospital Pharmacy Satellite:* This is any physically separate area used for the provision of pharmacy services that is dependent upon support services from a hospital pharmacy department (PCN, 2012).

### **Reference**

PCN. (2012). Pharmacists Council of Nigeria. The Four-part compendium of minimum standards for the assurance of pharmaceutical care in Nigeria. Abuja. Knowledge Bliss. Ibadan.
